# Supplementary material for: A multiferroic iron arsenide monolayer
Source: Royal Society of Chemistry journal article supplement (doi:10.1039/d1na00805f), 2022-01-01
Supplement: d1na00805f1.pdf [file d1na00805f1.pdf]

## Multiferroic Iron Arsenide Monolayer

Xiaoyu Xuan<sup>1</sup>, Tingfan Yang<sup>1</sup>, Jian Zhou<sup>2</sup>, Wanlin Guo<sup>1</sup> and Zhuhua Zhang<sup>1\*</sup>

<sup>1</sup> Key Laboratory for Intelligent Nano Materials and Devices of Ministry of Education, State Key Laboratory of Mechanics and Control of Mechanical Structures, and Institute for Frontier Science, Nanjing University of Aeronautics and Astronautics, Nanjing 210016, China.

<sup>2</sup> Center for Alloy Innovation and Design, State Key Laboratory for Mechanical Behavior of Materials, Xi'an Jiaotong University, Xi'an 710049, China

Email: chuwarzhang@nuaa.edu.cn

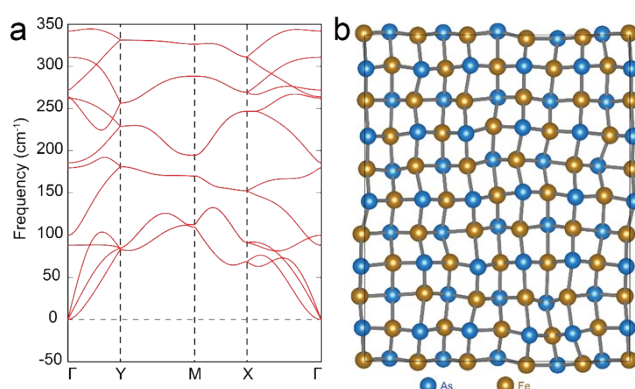

Fig. S1. (a) Calculated phonon spectra of the FeAs monolayer. (b) Snapshots of the FeAs monolayer at the end of 10 ps ab initio molecular dynamics simulations at 500 K.

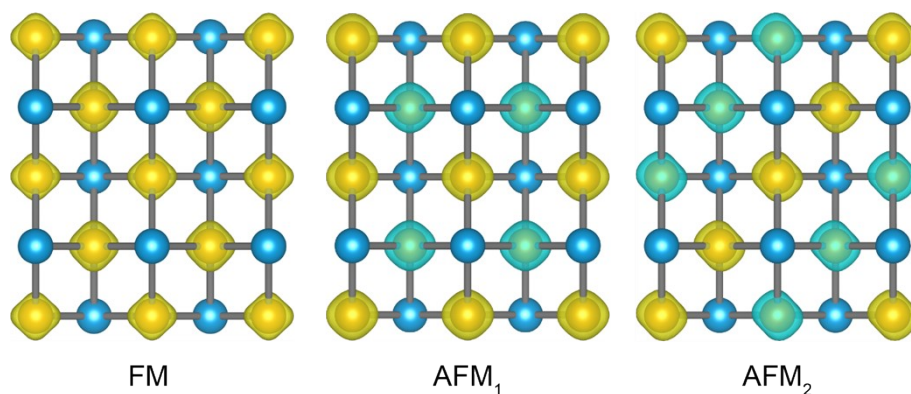

Fig. S2. Isosurface plots ( $0.67 e/\text{\AA}^3$ ) of spin density distribution.

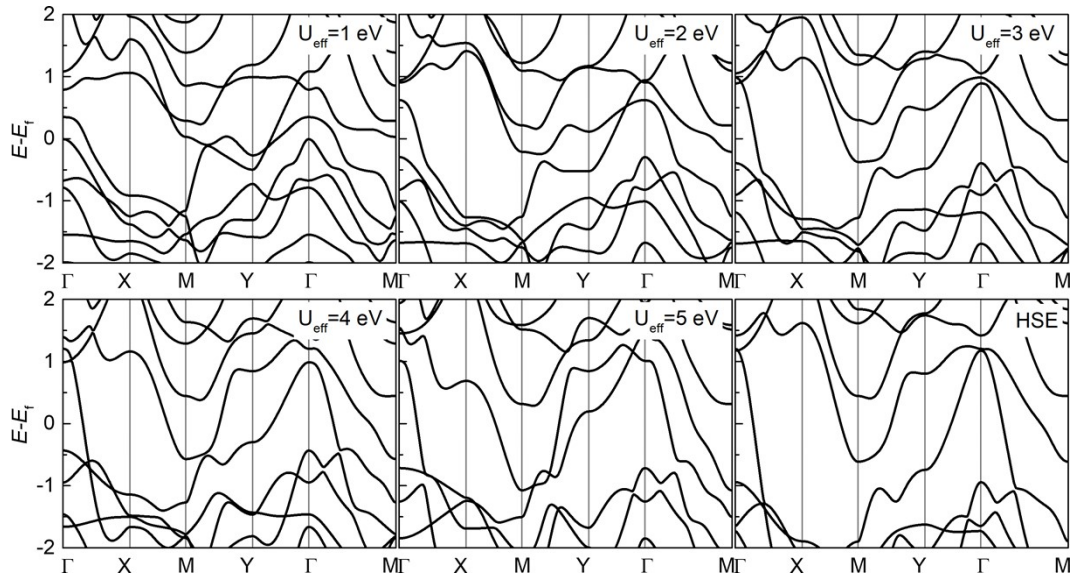

Fig. S3. Band structures of the FeAs monolayer in the AFM<sub>1</sub> state without the SOC calculated with the DFT+*U* method (the values of  $U_{\text{eff}}$  are provided) and HSE06 functional.

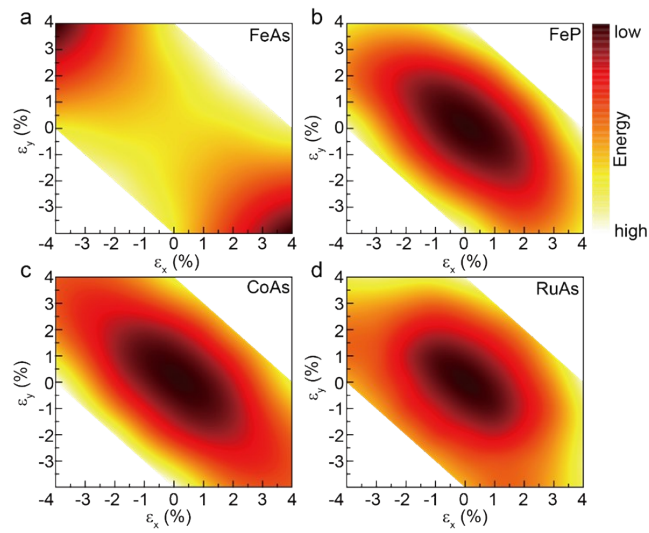

Fig. S4. The relationship between external strain ( $\epsilon$ ) and total energy of the FeAs (a), FeP (b), CoAs (c) and RuAs (d) monolayers. When  $\epsilon_x = \epsilon_y = 0$ , the crystal structure of these materials is square.

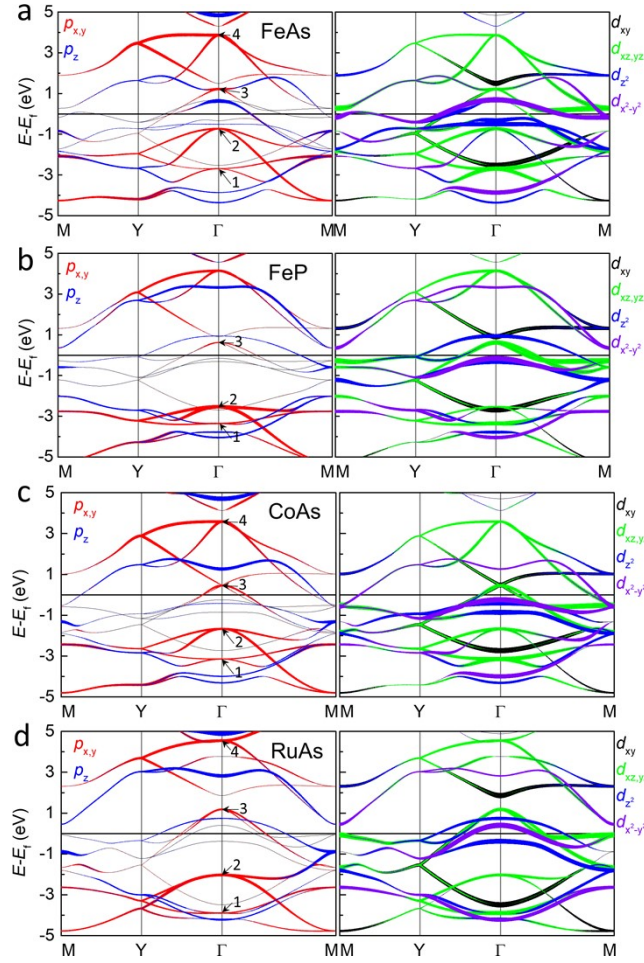

Fig. S5. The band structure without spin polarize of the FeAs (a), FeP (b), CoAs (c) and RuAs (d) monolayer. The contribution of  $p_{x,y}$  and  $p_z$  orbitals to the Bloch states plotted in left panel are denoted by red and blue, respectively, while the contribution of  $d_{xy}$ ,  $d_{xz,yz}$ ,  $d_{z^2}$  and  $d_{x^2-y^2}$  orbitals to the Bloch states plotted in the right panel are denoted by black, green, blue and violet, respectively. The four double degenerated states formed by  $d_{xz,yz}$  and  $p_{x,y}$  orbitals are denoted by 1, 2, 3 and 4.

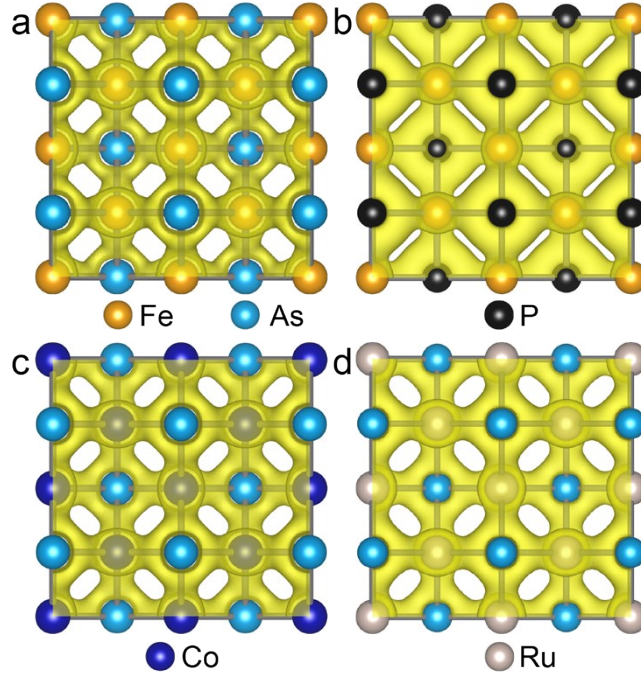

Fig. S6. Isosurface plots of the partial charge density to state 2 in FeAs (a), FeP (b), CoAs (c) and RuAs (d) monolayers with an isosurface value of  $0.054 \text{ e}/\text{\AA}^3$ .

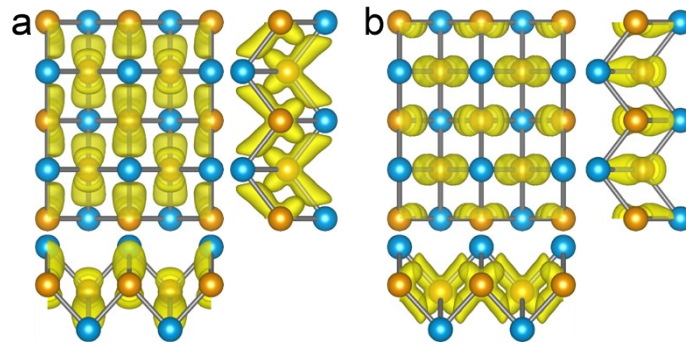

Fig. S7. Isosurface plots of the partial charge density to state 1 along  $y$ -axis direction (a) and  $x$ -axis direction (b) in FeAs monolayer with an isosurface value of  $0.054 \text{ e}/\text{\AA}^3$ .

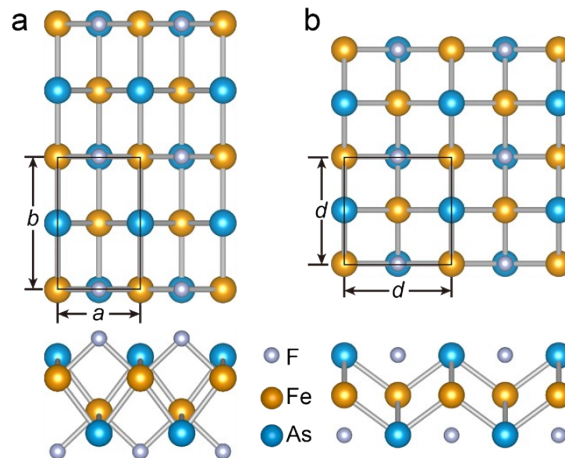

Fig. S8. Top and side views of the FeAsF monolayer at the initial state (a) and transition state (b), where the unite cell is denoted by the black rectangle. The origin, blue and grey balls represent Fe, As and F atoms, respectively. The lattice constant values of  $a$ ,

$b$  and  $d$  are 2.93, 4.71 and 3.91 Å, respectively.

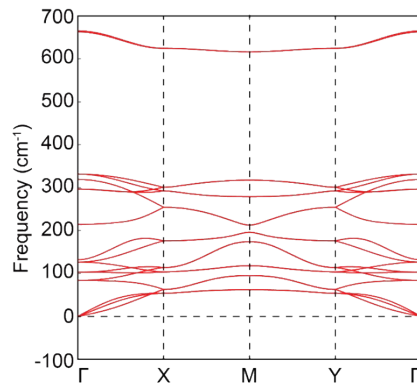

Fig. S9. Calculated phonon spectra of the fluorinated FeAs monolayer.

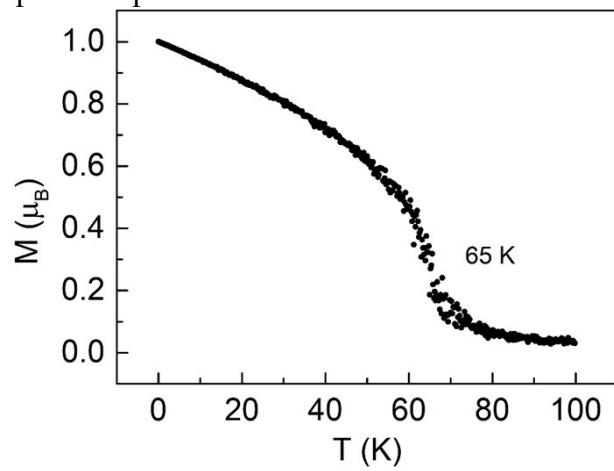

Fig. S10 Magnetic moments in the FeAsF monolayer as functions of temperature obtained from Monte Carlo simulations.
